# Supplementary material for: Identification and Validation of Three m6A Regulators: FTO, HNRNPC, and HNRNPA2B1 as Potential Biomarkers for Endometriosis
Source: MDPI journal article supplement (doi:10.3390/genes14010086), 2022-12-28
Supplement: s1 [file s1]

**Table S1.** Candidate gene expression and group classification in 3 distinct m6A patterns.

| ID                | HNRNPC   | HNRNPA2B1 | FTO      | m6Acluster |
|-------------------|----------|-----------|----------|------------|
| GSM150195_treat   | 3670.296 | 6036.206  | 1676.975 | A          |
| GSM150194_treat   | 4142.779 | 6182.694  | 1770.507 | A          |
| GSM150193_treat   | 3865.898 | 5801.169  | 2112.648 | A          |
| GSM150192_treat   | 3849.21  | 5590.758  | 1942.794 | A          |
| GSM150191_treat   | 3523.232 | 5326.378  | 2735.089 | B          |
| GSM150190_treat   | 4457.508 | 5993.68   | 1767.169 | A          |
| GSM150219_treat   | 3636.539 | 5252.191  | 1283.465 | B          |
| GSM150218_treat   | 3277.48  | 4955.735  | 1076.968 | B          |
| GSM150217_treat   | 3138.834 | 5004.853  | 1238.972 | B          |
| GSM150216_treat   | 3029.223 | 5216.749  | 1681.033 | B          |
| GSM150215_treat   | 3409.78  | 5133.821  | 1919.415 | B          |
| GSM150214_treat   | 2793.871 | 4745.617  | 2283.633 | B          |
| GSM150213_treat   | 3274.605 | 5095.796  | 1836.448 | B          |
| GSM150212_treat   | 3058.305 | 4845.218  | 1430.242 | B          |
| GSM150211_treat   | 3033.172 | 4845.218  | 1217.514 | B          |
| GSM150207_treat   | 3225.981 | 6320.337  | 1670.933 | A          |
| GSM150206_treat   | 2905.7   | 5680.125  | 2134.23  | B          |
| GSM150205_treat   | 3547.242 | 6761.105  | 1512.38  | A          |
| GSM150204_treat   | 3877.755 | 5801.169  | 2052.449 | A          |
| GSM150203_treat   | 3673.836 | 7899.378  | 1431.366 | C          |
| GSM150202_treat   | 3905.041 | 6362.645  | 1602.733 | A          |
| GSM150207_treat.1 | 3225.981 | 6320.337  | 1670.933 | A          |
| GSM150206_treat.1 | 2905.7   | 5680.125  | 2134.23  | B          |
| GSM150205_treat.1 | 3547.242 | 6761.105  | 1512.38  | A          |
| GSM150204_treat.1 | 3877.755 | 5801.169  | 2052.449 | A          |
| GSM150203_treat.1 | 3673.836 | 7899.378  | 1431.366 | C          |
| GSM150202_treat.1 | 3905.041 | 6362.645  | 1602.733 | A          |
