# Supplementary material for: Identification and Validation of Three m6A Regulators: FTO, HNRNPC, and HNRNPA2B1 as Potential Biomarkers for Endometriosis
Source: MDPI journal article supplement (doi:10.3390/genes14010086), 2022-12-28
Supplement: s1 [file s1]

**Table S2.** The enriched GO terms of differentially expressed genes.

| <b>ID</b>  | <b>Category</b> | <b>GO Name</b>                                                     | <b>P.value</b> | <b>geneID</b>   |
|------------|-----------------|--------------------------------------------------------------------|----------------|-----------------|
| GO:0000235 | CC              | astral microtubule                                                 | 0.00505359     | MAP9            |
| GO:0005818 | CC              | aster                                                              | 0.00505359     | MAP9            |
| GO:1990023 | CC              | mitotic spindle midzone                                            | 0.00642789     | MAP9            |
| GO:0030008 | CC              | TRAPP complex                                                      | 0.00780051     | TRAPPC6B        |
| GO:0043186 | CC              | P granule                                                          | 0.00917144     | TDRD9           |
| GO:0060293 | CC              | germ plasm                                                         | 0.00917144     | TDRD9           |
| GO:0045495 | CC              | pole plasm                                                         | 0.00962805     | TDRD9           |
| GO:0005874 | CC              | microtubule                                                        | 0.01561641     | MAP9/TUBB2<br>A |
| GO:0051233 | CC              | spindle midzone                                                    | 0.01645468     | MAP9            |
| GO:0099023 | CC              | vesicle tethering complex                                          | 0.02818849     | TRAPPC6B        |
| GO:0005876 | CC              | spindle microtubule                                                | 0.03266825     | MAP9            |
| GO:0005801 | CC              | cis-Golgi network                                                  | 0.03311522     | TRAPPC6B        |
| GO:0005881 | CC              | cytoplasmic microtubule                                            | 0.0340086      | MAP9            |
| GO:0015030 | CC              | Cajal body                                                         | 0.03534729     | HNRNPA2B1       |
| GO:0071013 | CC              | catalytic step 2 spliceosome                                       | 0.03935348     | HNRNPA2B1       |
| GO:0016363 | CC              | nuclear matrix                                                     | 0.04996446     | HNRNPA2B1       |
| GO:0098505 | MF              | G-rich strand telomeric DNA<br>binding                             | 0.00489023     | HNRNPA2B1       |
| GO:0043047 | MF              | single-stranded telomeric<br>DNA binding                           | 0.00586572     | HNRNPA2B1       |
| GO:0034450 | MF              | ubiquitin-ubiquitin ligase<br>activity                             | 0.00635315     | PELI1           |
| GO:0098847 | MF              | sequence-specific single<br>stranded DNA binding                   | 0.00732737     | HNRNPA2B1       |
| GO:0005001 | MF              | transmembrane receptor<br>protein tyrosine phosphatase<br>activity | 0.00830073     | PTPRG           |
| GO:0019198 | MF              | transmembrane receptor<br>protein phosphatase activity             | 0.00830073     | PTPRG           |
| GO:0035198 | MF              | miRNA binding                                                      | 0.01654017     | HNRNPA2B1       |
| GO:0042162 | MF              | telomeric DNA binding                                              | 0.0175055      | HNRNPA2B1       |
| GO:0031492 | MF              | nucleosomal DNA binding                                            | 0.01943364     | HMG5            |
| GO:0061980 | MF              | regulatory RNA binding                                             | 0.02231954     | HNRNPA2B1       |
